# Supplementary material for: Baby Food Pouches, Baby-Led Weaning, and Iron Status in New Zealand Infants: An Observational Study
Source: MDPI journal article supplement (doi:10.3390/nu16101494), 2024-05-15
Supplement: s1 [file s1]

## Supplementary Materials

**Supplementary Table S1.** Body iron and iron sufficiency by demographic and current feeding characteristics (n=364).

|                                        | n   | Body iron, mg/kg |                      | Iron sufficiency <sup>a</sup> |                      |
|----------------------------------------|-----|------------------|----------------------|-------------------------------|----------------------|
|                                        |     | Mean (SD)        | p-value <sup>b</sup> | n (%)                         | p-value <sup>b</sup> |
| Infant characteristics                 |     |                  |                      |                               |                      |
| Infant age                             |     |                  | 0.004                |                               | 0.016                |
| 7-7.9 months                           | 143 | 3.8 (3.2)        |                      | 119 (83.2)                    |                      |
| 8-8.9 months                           | 139 | 2.6 (3.3)        |                      | 97 (69.8)                     |                      |
| 9-10.0 months                          | 82  | 2.9 (2.9)        |                      | 67 (81.7)                     |                      |
| Infant sex <sup>c</sup>                |     |                  | 0.002                |                               | 0.024                |
| Female                                 | 161 | 3.7 (3.2)        |                      | 134 (83.2)                    |                      |
| Male                                   | 202 | 2.7 (3.1)        |                      | 148 (73.3)                    |                      |
| Infant ethnicity <sup>d</sup>          |     |                  | 0.267                |                               | 0.121                |
| Māori                                  | 62  | 3.5 (3.1)        |                      | 51 (82.3)                     |                      |
| Pacific                                | 14  | 3.9 (2.0)        |                      | 13 (92.9)                     |                      |
| Asian                                  | 39  | 2.6 (3.7)        |                      | 31 (79.5)                     |                      |
| Others                                 | 10  | 1.5 (3.0)        |                      | 5 (50.0)                      |                      |
| NZ and other European                  | 239 | 3.1 (3.2)        |                      | 183 (76.6)                    |                      |
| Infant born at term <sup>e</sup>       |     |                  | 0.001                |                               | <0.001               |
| Yes                                    | 340 | 3.3 (3.0)        |                      | 272 (80.0)                    |                      |
| No                                     | 24  | 1.0 (5.1)        |                      | 11 (45.8)                     |                      |
| Infant BMI category <sup>f</sup>       |     |                  | 0.077                |                               | 0.033                |
| At risk of overweight (BMI z-score >1) | 84  | 2.6 (3.3)        |                      | 58 (69.1)                     |                      |
| Not overweight (BMI z score ≤1)        | 272 | 3.3 (3.2)        |                      | 218 (80.2)                    |                      |
| Respondent characteristics             |     |                  |                      |                               |                      |
| Respondent age <sup>g</sup>            |     |                  | 0.331                |                               | 0.319                |

|                                             |     |           |            |              |
|---------------------------------------------|-----|-----------|------------|--------------|
| <25 years                                   | 21  | 4.1 (2.0) | 19 (90.5)  |              |
| 25-35 years                                 | 211 | 3.1 (3.4) | 161 (76.3) |              |
| ≥35 years                                   | 131 | 3.0 (3.0) | 103 (78.6) |              |
| Highest level of education completed        |     |           | 0.461      | 0.930        |
| School (primary or secondary)               | 49  | 2.7 (3.7) | 38 (77.6)  |              |
| Polytechnic or similar tertiary institution | 71  | 3.4 (3.4) | 54 (76.1)  |              |
| University                                  | 243 | 3.1 (3.0) | 190 (78.2) |              |
| Maternal parity <sup>g</sup>                |     |           | 0.450      | 0.363        |
| Primiparous                                 | 178 | 3.3 (3.2) | 142 (79.8) |              |
| Multiparous                                 | 186 | 3.0 (3.2) | 141 (75.8) |              |
| Current employment status                   |     |           | 0.700      | 0.066        |
| Employed full time                          | 45  | 3.0 (2.6) | 39 (86.7)  |              |
| Employed part time                          | 84  | 3.4 (3.0) | 70 (83.3)  |              |
| Other <sup>h</sup>                          | 235 | 3.1 (3.4) | 174 (74.0) |              |
| Respondent weight status <sup>i</sup>       |     |           | 0.054      | 0.425        |
| Overweight or obese                         | 217 | 2.8 (3.3) | 164 (75.6) |              |
| Normal weight                               | 135 | 3.5 (3.0) | 107 (79.3) |              |
| Childcare use                               |     |           | 0.711      | <b>0.029</b> |
| Formal care <sup>j</sup>                    | 66  | 3.3 (2.5) | 58 (87.9)  |              |
| No formal care                              | 298 | 3.1 (3.3) | 225 (75.5) |              |
| <b>Household factors</b>                    |     |           |            |              |
| Number of children living in household      |     |           | 0.554      | 0.427        |
| One                                         | 165 | 3.3 (3.2) | 133 (80.6) |              |
| Two                                         | 124 | 3.0 (3.3) | 92 (74.2)  |              |
| Three or more                               | 74  | 3.0 (3.1) | 57 (77.0)  |              |

|                                               |     |           |                  |            |                  |
|-----------------------------------------------|-----|-----------|------------------|------------|------------------|
| Number of adults living in household          |     |           | 0.597            |            | 0.532            |
| One                                           | 16  | 3.7 (2.8) |                  | 14 (87.5)  |                  |
| Two                                           | 311 | 3.1 (3.3) |                  | 239 (76.9) |                  |
| Three or more                                 | 37  | 2.7 (3.0) |                  | 30 (81.1)  |                  |
| Household deprivation decile <sup>k</sup>     |     |           | 0.415            |            | 0.620            |
| 1-3 (Low)                                     | 111 | 3.1 (3.1) |                  | 85 (76.6)  |                  |
| 4-7                                           | 165 | 3.3 (3.2) |                  | 132 (80.0) |                  |
| 8-10 (High)                                   | 88  | 2.8 (3.3) |                  | 66 (75.0)  |                  |
| <b>Current infant feeding characteristics</b> |     |           |                  |            |                  |
| Ever breastfed                                |     |           | <b>0.037</b>     |            | 0.104            |
| Yes                                           | 355 | 3.1 (3.2) |                  | 274 (77.2) |                  |
| No                                            | 9   | 5.3 (2.3) |                  | 9 (100)    |                  |
| Currently breastfed                           |     |           | <b>&lt;0.001</b> |            | <b>&lt;0.001</b> |
| Yes                                           | 249 | 2.6 (3.5) |                  | 177 (71.1) |                  |
| No                                            | 115 | 4.2 (2.0) |                  | 106 (92.2) |                  |
| Current infant formula intake <sup>l</sup>    |     |           | <b>&lt;0.001</b> |            | <b>&lt;0.001</b> |
| No formula                                    | 191 | 2.4 (3.7) |                  | 127 (66.5) |                  |
| <1000 kJ/d                                    | 49  | 4.0 (3.0) |                  | 41 (83.7)  |                  |
| 1000 to <2500 kJ/d                            | 82  | 3.8 (1.9) |                  | 78 (95.1)  |                  |
| ≥2500 kJ/d                                    | 42  | 4.1 (2.1) |                  | 37 (88.1)  |                  |
| Current iron supplement <sup>m</sup>          |     |           | 0.847            |            | 0.643            |
| Yes                                           | 3   | 3.5 (4.9) |                  | 2 (66.7)   |                  |
| No                                            | 361 | 3.1 (3.2) |                  | 281 (77.8) |                  |

Abbreviations: Body mass index, BMI; NZ, New Zealand.

<sup>a</sup> Iron sufficiency was defined as: Plasma ferritin ≥15 µg/L, in the absence of iron depletion, early “functional” iron deficiency, and iron deficiency anaemia.

<sup>b</sup> Determined using one-way ANOVA F test for body iron and chi-squared test for iron sufficiency.

<sup>c</sup> n=1 missing data (participant did not specify sex).

---

<sup>d</sup> Participants who reported two or more ethnic groups were assigned to a single group using a prioritisation system [22], with the following order of priority (from highest to lowest): Māori, Pacific, Asian, Others, NZ and other European.

<sup>e</sup> Term is defined as 37 weeks gestation or older.

<sup>f</sup> n=16 missing data; BMI z-score was calculated using WHO BMI-for-age child growth standards [25,26].

<sup>g</sup> n=1 missing data.

<sup>h</sup> Not employed, or is currently on parental leave.

<sup>i</sup> n=29 missing data; Overweight or obese defined as BMI  $\geq 25$  kg/m<sup>2</sup> [37].

<sup>j</sup> Formal care is defined as early childhood education centre or home-based care.

<sup>k</sup> Determined using the New Zealand Index of Deprivation 2018 [23].

<sup>l</sup> Infant formula intake is based on mean kilojoule intake per day using data from the 24-hour diet recalls.

<sup>m</sup> Iron from iron supplements ranged from 0.084 mg/day to 11.4 mg/day.
